# Supplementary material for: An unexpected all-metal aromatic tetranuclear silver cluster in human copper chaperone Atox1
Source: Royal Society of Chemistry journal article supplement (doi:10.1039/d1sc07122j), 2022-01-01
Supplement: d1sc07122j1.pdf [file d1sc07122j1.pdf]

## Supplementary Information

### An Unexpected All-Metal Aromatic Tetranuclear Silver Cluster in Human Copper Chaperone Atox1

Xiuxiu Wang<sup>a, b</sup>, Zong-Chang Han<sup>c</sup>, Wei Wei<sup>\*a, b, f</sup>, Hanshi Hu<sup>c</sup>, Pengfei Li<sup>d</sup>, Peiqing Sun<sup>b</sup>, Xiangzhi Liu<sup>a</sup>, Zhijia Lv<sup>g</sup>, Feng Wang<sup>g</sup>, Yi Cao<sup>d</sup>, Zijian Guo<sup>\*a, b, e</sup>, Jun Li<sup>\*c, h</sup> and Jing Zhao<sup>\*a, b, e, f</sup>

<sup>a</sup> State Key Laboratory of Coordination Chemistry, Chemistry and Biomedicine Innovation Center (ChemBIC), School of Chemistry and Chemical Engineering, Nanjing University, Nanjing 210023, China.

<sup>b</sup> School of Life Sciences, Nanjing University, Nanjing 210023, China.

<sup>c</sup> Department of Chemistry and Key Laboratory of Organic Optoelectronics & Molecular Engineering of Ministry of Education, Tsinghua University, Beijing 100084, China.

<sup>d</sup> National Laboratory of Solid State Microstructure, Department of Physics, Nanjing University, Nanjing 210023, China.

<sup>e</sup> Nanchuang (Jiangsu) Institute of Chemistry and Health, Nanjing 210023, China.

<sup>f</sup> Shenzhen Research Institute, Nanjing University, Shenzhen, 518000, China.

<sup>g</sup> Elias James Corey Institute of Biomedical Research, Wuxi Biortus Biosciences Co., Ltd, Jiangyin, 214437, China.

<sup>h</sup> Department of Chemistry, Southern University of Science and Technology, Shenzhen 518055, China

## ***Experimental***

**Protein Sample preparation for Single-molecule AFM.** Glasses were first immersed into chromic acid for 2h to remove impurities. After rinsing with Mili-Q water, glasses was covered by silane-PEG-NHS solution in DMSO (Nanocs inc, 5kDa, 1mg ml<sup>-1</sup>) for 2h. Glasses were rinsed with large amount of DMSO to remove the unreacted silane-PEG-NHS. Then glassed was covered by NH<sub>2</sub>-BG solution in DMSO (10μg ml<sup>-1</sup>) for 2h, so protein snap can directly bind to glasses. Finally, rinsing glasses with Mili-Q water to remove unreacted NH<sub>2</sub>-BG. Glasses was used immediately after finishing the modification process. For cantilever was coated by Au, protein cys-Xmod-doc can directly bind on it.

**Crystallization.** Crystal screening was performed at 293 K by the sitting-drop vapour-diffusion method. A 200 nanolitre protein solution (27 mg/mL) was mixed with 200 nanolitre reservoir solution and equilibrated against 30 microlitre reservoir solution. Commercial crystallization kits from Hampton Research and Qiagen were used for crystal screening. Initial crystals of Atox1 were observed under the following condition: 0.2 M tri-sodium citrate, 20 % (w/v) PEG 3350. Single crystals were obtained by further optimization of salt concentration and pH values. For heavy atom derivative crystals preparation, we added 5 mM AgNO<sub>3</sub> to a cryo-protection solution (0.2 M tri-sodium citrate, 20 % (w/v) PEG 3350, 25% glycerol), soaked the crystals for about 4 hours and then the data were collected at home source diffraction system. For Crystal optimizing, protein was incubated with 5mM TCEP and 5mM AgNO<sub>3</sub> on ice for 3 hours. A 200 nanolitre protein solution (29 mg/mL) was mixed with 180 nanolitre reservoir solution and 20 nanolitre lysozyme seed, and equilibrated against 15 microlitre reservoir solution. Final crystals of Atox1 were observed under the following condition: 0.2M LiCl, 0.1M Tris pH 8, 20% PEG 6,000. For heavy atom derivative crystals preparation, we added 5 mM AgNO<sub>3</sub> and 5 mM TCEP to a reservoir solution (0.2M LiCl, 0.1M Tris pH 8, 20% PEG 6,000), soaked the crystals for about 4 hours, and then added 5 mM AgNO<sub>3</sub> to a cryo-protection solution. The data were collected at SSRF BL18U1.

The contents of the unit cell were analysed using the Matthews coefficient (Matthews, 1968). Molecular replacements were performed using MOLREP (Vagin & Teplyakov, 2010) and Phaser (McCoy, 2007). The models were refined by iterative cycles of manual building using Coot (Emsley *et al.*, 2010) followed by simulated annealing. Subsequent stages of refinement were carried out with REFMAC5 (Murshudov *et al.*, 2011) within the CCP4 suite (Winn *et al.*, 2011; Collaborative Computational Project, Number 4, 1994) and manual improvement in Coot. All structural representations were generated using PyMOL (DeLano, 2002) with subsequent ray tracing.

**Protein expression.** The DNA fragment encoding the Homo sapiens protein Atox1 protein was synthesis by Nanjing GenScript Biotechnology Corporation. The fusion protein 6×His-TEV-Atox1 was sub-cloned into a pET28a vector by standard polymerase chain reaction (PCR) methods, and the resulting construct was subsequently transformed into BL21 (DE3) cells. The fusion protein was expressed in LB medium containing 50 μg/mL kanamycin after induction with 1 mM IPTG at 15°C. To obtain purified Atox1, *E.coli* BL21 (DE3) cells containing the recombinant plasmid that had been cultured overnight were collected by centrifugation. The pellet was re-suspended in buffer (50 mM Tris-HCl pH 7.0, 500 mM NaCl and 5% v/v glycerol) and dissociated by microfluid. The supernatant was obtained by centrifuging the cell lysate at 20,000 rpm and 277 K for 1 h. Standard Ni-affinity chromatography (His-Trap FF) was performed for preliminary purification of the His-tagged fusion protein from the supernatant. The enrichment fusion protein was digested by TEV

protease at 277 K overnight. Ni-affinity chromatography (His Trap HP) was used again to obtain Atox1, which was separated from the 6×His -TEV fusion protein. High purity Atox1 was obtained after further purified by size-exclusion chromatography (Superdex 30) and was concentrated.

For the loop bypass mutant, the sequence of Coh-(GB1)4-Atox1-linker-Atox1-(GB1)4-Snap is as follows:

**Coh:**

MGTALTRGMTYDLDPKDGSSAATKPVLEVTKKVFDTAADAAGQTVTVEFKVSGAEGKYATTGYHIYWDER  
LEVVATKTGAYAKKGAALDSSLAKAENNGNGVVFVASGADDDFGADGVMWTVELKVPADAKAGDVYPIDV  
AYQWDPKSGDLFTDNKDSAQGKLMQAYFFTQGIKSSSNPSTDEYLVKANATYADGYIAIKAGEP

**GB1:**

MDTYKLILNGKTLKGETTTEAVDAATAEKVFKQYANDNGVDGEWTYDDATKTFTVTE

**ATOX1:**

MPKHEFSVDMTCGGCAEAVSRVLNKLGGVKYDIDLPNKKVCIESEHSMDTLLATLKKTKGTVSYLGLLE

**Linker:**

RSGSGSGSGSGSGSGSGSGSGSGSGSGSGSGSGSGSGSGSGSGSGSGSGSGSGSGSGSGSGSGSRS

**Snap:**

GGGMDKDCEMKRTTLDSPKLELSGCEQGLHEIKLLGKGTSAADAVEVPAPAAVLGGPEPLMQATAWLNA  
YFHQPEAIEEFPVPALHHPVFQQESFTRQVLWKLKVVKFGEVISYQQLAALAGNPAATAAVKTALSGNPVPIPI  
PCHRVVSSSGAVGGYEGGLAVKEWLLAHEGHRLGKPGGLGPA

**Cys-Xmod-Doc:**

CGGNTVTSVAVKTQYVEIESVDGFYFNTEDEKFDTAQIKKAVLHTVYNEGYTGDDGVAVVLREYESEPVDTITAE  
TFGDATPANTYKAVENKFDYEIPVYYNATLKDAGNDATVTVYIGLKGDSDLNIVDGRDATLTYAAT  
STDGKDATTVALSPSTLVGGNPESVYDDFSAFLSDVKVDAGKELTRFAKKAERLIDGRDASSILTFYTKSSVDQ  
YKDMAANEPNKLWDIVTGD

**Mass Spectrometry.** Proteins were injected into a reverse phase HPLC (Agilent 1200 series HPLC, Agilent Technologies) with a ProSwift™ RP-3U LC Column (4.6×50 mm, SS, Thermo Scientific™). Positive ion Electrospray Ionization (ESI) mass spectra for intact protein were obtained with an Agilent 6224 mass spectrometer equipped with an ESI interface and a time-of-flight (TOF) mass detector (Agilent Technologies). Mass spectra were analyzed and deconvoluted using an Agilent software MassHunter version B.04.00 (Agilent Technologies).

**Inductively coupled plasma mass spectrometry (ICP-MS) experiments.** To confirm the binding condition of Atox1 fusion protein and Ag, we conducted ICP-MS detection in a 220 µl complex solution containing Atox1 fusion protein and Ag. As a result, we found that the molar ratio of Ag ( $0.278 \times 10^{-6}$  mol) and Atox1 ( $0.064 \times 10^{-6}$  mol) was about 4.34 in Ag-Atox1 complex.

**Single-molecule AFM experiments.** Single-molecule AFM experiments were carried out on a commercial AFM (Force Robot 300, JPK, Berlin, Germany). All the force-extension experiments were carried out in Tris-HCl buffer (25mM Tris, 72mM NaCl). Protein sample ( $0.1\text{mg ml}^{-1}$ , 150µl) was directly deposited on a freshly cleaved glass surface for 2h and was washed with buffer to remove unreacted protein. We modified the cantilever tip with cys-Xmod-doc. The gold-coated

cantilever was immersed in a protein solution (0.1 mg ml<sup>-1</sup>) for 1 hour at room temperature to allow the formation of gold-thiol linkage. The physically adsorbed proteins were removed by rinsing the cantilever tip with deionized water for at least 5 times in an incubator. Then, the sample chamber was filled with 1ml buffer before the measurement. The spring constant of the AFM cantilevers (Biolever-RC-150VB-70 from Olympus) was calibrated using the equipartition theorem before each experiment, with a typical value of 6pN nm<sup>-1</sup>. The pulling speed was 400 nm s<sup>-1</sup> for all traces.

**EPR measurement.** 0.2 mM Atox1 was incubated with 10 molar equivalents of AgNO<sub>3</sub> in 20 mM Tris buffer containing 200 mM NaCl. Then the spin-trapping agent 5,5-dimethylpyrroline-N-oxide (DMPO) was added to the reaction mixture. After shaking for 1 minute, the sample was transferred to a quartz capillary tube. For MTSSL labeling, 0.2 mM Atox1 was incubated with 10 molar equivalents of MTSSL overnight at 4°C. Then the reaction mixture was added to Ni-NTA to remove free spin label. The continuous-wave electron paramagnetic resonance (CW-EPR) spectra were recorded on a Bruker A300 spectrometer (Bruker Biospin GmbH, Rheinstetten, Germany) at X-band (9.5 GHz).

**Crystallization.** Crystal screening was performed at 293 K by the sitting-drop vapour-diffusion method. A 200 nanolitre protein solution (27 mg/mL) was mixed with 200 nanolitre reservoir solution and equilibrated against 30 microlitre reservoir solution. Commercial crystallization kits from Hampton Research and Qiagen were used for crystal screening. Initial crystals of Atox1 were observed under the following condition: 0.2 M tri-sodium citrate, 20 % (w/v) PEG 3350. Single crystals were obtained by further optimization of salt concentration and pH values. For heavy atom derivative crystals preparation, we added 5 mM AgNO<sub>3</sub> to a cryo-protection solution (0.2 M tri-sodium citrate, 20 % (w/v) PEG 3350, 25% glycerol), soaked the crystals for about 4 hours and then the data were collected at home source diffraction system.

Crystal optimizing was performed at 293 K by the sitting-drop vapour-diffusion method. Protein was incubated with 5mM TCEP and 5mM AgNO<sub>3</sub> on ice for 3 hours. A 200 nanolitre protein solution (29 mg/mL) was mixed with 180 nanolitre reservoir solution and 20 nanolitre lysozyme seed, and equilibrated against 15 microlitre reservoir solution. Final crystals of Atox1 were observed under the following condition: 0.2M LiCl, 0.1M Tris pH 8, 20% PEG 6,000. For heavy atom derivative crystals preparation, we added 5 mM AgNO<sub>3</sub> and 5 mM TCEP to a reservoir solution (0.2M LiCl, 0.1M Tris pH 8, 20% PEG 6,000), soaked the crystals for about 4 hours, and then added 5 mM AgNO<sub>3</sub> to a cryo-protection solution. The data were collected at SSRF BL18U1.

The contents of the unit cell were analysed using the Matthews coefficient (Matthews, 1968). Molecular replacements were performed using MOLREP (Vagin & Teplyakov, 2010) and Phaser (McCoy, 2007). The models were refined by iterative cycles of manual building using Coot (Emsley *et al.*, 2010) followed by simulated annealing. Subsequent stages of refinement were carried out with REFMAC5 (Murshudov *et al.*, 2011) within the CCP4 suite (Winn *et al.*, 2011; Collaborative Computational Project, Number 4, 1994) and manual improvement in Coot. All structural representations were generated using PyMOL (DeLano, 2002) with subsequent ray tracing.

### **Theoretical Analyses and Computational Modeling.**

In Figure 3, the electronic structure of Ag<sub>4</sub><sup>2+</sup> cluster based on the experimentally measured geometry (Figure 2) have been investigated using density functional theory (DFT) with Amsterdam Density Functional 2019 program. The calculations were done using PBE exchange-correlation functional and the TZP Slater basis sets. Frozen core

approximation was applied to the  $[1s^2...4p^6]$  core of Ag, and Zeroth-Order Regular Approximation to the Dirac Equation (ZORA) was used to account for the scalar relativistic (SR) effect.

The constrained DFT geometry optimization was done at the level of SR-ZORA PBE/DZP with Grimme D3-BJ Dispersion Correction. The model of constrained geometry optimization adopted  $[Ag_4]^{9+}$  cluster inside the frozen experimental cavity, with size about 5 Å around the  $[Ag_4]^{9+}$  core. The calculated molecular orbital (MO) energy levels and wavefunctions of  $Ag_4^{2+}$  cluster are listed in Table S3-S5, which were analyzed using Hückel method based on three kinds of geometry structures with  $T_d$ ,  $D_{4h}$  and  $D_{2h}$  symmetry. The MO energies and frontier MOs of optimized geometry structures with  $T_d$ ,  $D_{4h}$  and  $D_{2h}$  symmetries and experimentally measured structure with  $C_2$  symmetry were studied by ADF 2019 program with level of PBE/TZP, frozen core approximation and ZORA scalar relativistic method.

The ELF color-filled map and multicenter bond index were calculated using Gaussian-16B and Multiwfn-3.8 at the level of PBE0/def2-TZVP. The nucleus-independent chemical shift (NICS) of  $Ag_4^{2+}$  cluster based on the experimentally measured geometry was studied using Multiwfn and Gaussian with level of B3LYP/def2-SVP.

### Cartesian Coordinates of Geometry Structures

Experimental structure of  $Ag_4-(Atox1)_2$  7DC1:

|    |            |           |           |
|----|------------|-----------|-----------|
| Ag | -27.203000 | 46.371000 | 7.945000  |
| Ag | -29.133000 | 45.802000 | 9.934000  |
| Ag | -26.557000 | 46.744000 | 11.514000 |
| Ag | -25.099000 | 48.131000 | 9.525000  |
| N  | -28.361000 | 48.860000 | 4.792000  |
| C  | -27.081000 | 49.589000 | 4.574000  |
| C  | -25.891000 | 48.627000 | 4.676000  |
| C  | -26.964000 | 50.740000 | 5.578000  |
| O  | -27.127000 | 50.312000 | 6.930000  |
| H  | -26.820000 | 51.001000 | 7.524000  |
| H  | -28.777896 | 49.166964 | 5.647553  |
| H  | -25.999884 | 51.192138 | 5.473347  |
| N  | -26.071000 | 47.402000 | 5.159000  |
| C  | -24.953000 | 46.440000 | 5.296000  |
| C  | -25.498000 | 45.017000 | 5.233000  |

|   |            |           |           |
|---|------------|-----------|-----------|
| O | -26.714000 | 44.871000 | 5.238000  |
| C | -24.180000 | 46.719000 | 6.596000  |
| S | -24.925000 | 46.060000 | 8.125000  |
| H | -24.091000 | 47.800000 | 6.706000  |
| H | -26.998000 | 47.118000 | 5.441000  |
| H | -24.248000 | 46.558000 | 4.473000  |
| H | -23.226000 | 46.203000 | 6.487000  |
| N | -24.615000 | 44.048000 | 5.170000  |
| H | -23.638879 | 44.256229 | 5.231875  |
| N | -25.498000 | 42.692000 | 7.408000  |
| C | -26.141000 | 42.143000 | 8.613000  |
| C | -27.660000 | 42.282000 | 8.539000  |
| O | -28.391000 | 41.595000 | 9.364000  |
| H | -25.782175 | 42.669416 | 9.472669  |
| H | -24.658993 | 43.170734 | 7.666614  |
| N | -28.155000 | 43.145000 | 7.656000  |
| C | -29.605000 | 43.435000 | 7.533000  |
| C | -30.366000 | 42.201000 | 7.022000  |
| O | -31.598116 | 42.083025 | 7.249031  |
| C | -29.860000 | 44.677000 | 6.684000  |
| S | -29.519000 | 46.245000 | 7.532000  |
| H | -30.906000 | 44.674000 | 6.379000  |
| H | -27.514000 | 43.625000 | 7.041000  |
| H | -29.993000 | 43.662000 | 8.526000  |
| H | -29.173000 | 44.624000 | 5.839000  |
| N | -31.221000 | 40.627000 | 10.217000 |

|   |            |           |           |
|---|------------|-----------|-----------|
| C | -32.130000 | 41.528000 | 10.972000 |
| C | -31.685000 | 42.966000 | 10.843000 |
| H | -31.594000 | 43.409000 | 11.835000 |
| H | -30.419820 | 41.001675 | 9.750384  |
| H | -32.124594 | 41.248882 | 12.004939 |
| H | -32.419000 | 43.523000 | 10.261000 |
| H | -30.719000 | 43.003000 | 10.339000 |
| C | -33.325000 | 48.376000 | 9.028000  |
| C | -31.958000 | 47.762000 | 8.859000  |
| N | -30.957000 | 48.407000 | 9.735000  |
| H | -30.670000 | 47.758000 | 10.454000 |
| H | -34.059238 | 47.741331 | 8.577457  |
| H | -31.645000 | 47.875000 | 7.821000  |
| H | -33.540104 | 48.486214 | 10.070345 |
| H | -32.022000 | 46.709000 | 9.134000  |
| H | -30.154000 | 48.677000 | 9.186000  |
| H | -27.840000 | 49.445000 | 9.220000  |
| H | -28.104000 | 48.893000 | 10.664000 |
| O | -31.111000 | 46.252000 | 11.542000 |
| H | -30.238000 | 45.932000 | 11.782000 |
| H | -31.435000 | 45.761000 | 10.784000 |
| N | -28.134000 | 48.991000 | 14.667000 |
| C | -29.405000 | 48.247000 | 14.885000 |
| C | -29.167000 | 46.736000 | 14.783000 |
| C | -30.460000 | 48.722000 | 13.881000 |
| O | -30.008000 | 48.649000 | 12.529000 |

|   |            |           |           |
|---|------------|-----------|-----------|
| H | -30.047000 | 49.522000 | 12.131000 |
| H | -27.715817 | 48.692270 | 13.809163 |
| H | -31.334040 | 48.113718 | 13.985628 |
| N | -28.016000 | 46.279000 | 14.300000 |
| C | -27.742000 | 44.830000 | 14.163000 |
| C | -26.237000 | 44.590000 | 14.226000 |
| O | -25.502000 | 45.571000 | 14.221000 |
| C | -28.370000 | 44.300000 | 12.863000 |
| S | -27.427000 | 44.616000 | 11.334000 |
| H | -29.351000 | 44.763000 | 12.753000 |
| H | -27.307000 | 46.940000 | 14.018000 |
| H | -28.197000 | 44.279000 | 14.986000 |
| H | -28.399000 | 43.216000 | 12.971000 |
| N | -25.839000 | 43.341000 | 14.289000 |
| H | -26.507184 | 42.599581 | 14.227122 |
| N | -24.223000 | 43.428000 | 12.051000 |
| C | -23.426000 | 43.710000 | 10.846000 |
| C | -22.787000 | 45.095000 | 10.920000 |
| O | -21.827000 | 45.385000 | 10.095000 |
| H | -24.061230 | 43.662325 | 9.986285  |
| H | -25.219626 | 43.373298 | 11.989804 |
| N | -23.287000 | 45.955000 | 11.803000 |
| C | -22.813000 | 47.356000 | 11.926000 |
| C | -21.364000 | 47.398000 | 12.437000 |
| O | -20.645759 | 48.406067 | 12.210060 |
| C | -23.761000 | 48.198000 | 12.775000 |



|   |            |           |           |
|---|------------|-----------|-----------|
| S | -25.290000 | 48.687000 | 11.927000 |
| H | -23.235000 | 49.103000 | 13.080000 |
| H | -24.023000 | 45.640000 | 12.418000 |
| H | -22.816000 | 47.806000 | 10.933000 |
| H | -24.058000 | 47.576000 | 13.620000 |
| N | -19.574000 | 47.352000 | 9.242000  |
| C | -19.899000 | 48.589000 | 8.487000  |
| C | -21.367000 | 48.923000 | 8.616000  |
| H | -21.697000 | 49.462000 | 7.728000  |
| H | -20.357313 | 46.730866 | 9.217233  |
| H | -19.660005 | 48.444394 | 7.454106  |
| H | -21.523000 | 49.544000 | 9.498000  |
| H | -21.941000 | 48.002000 | 8.715000  |
| C | -25.232000 | 53.048000 | 10.431000 |
| C | -25.384000 | 51.557000 | 10.600000 |
| N | -26.443000 | 51.013000 | 9.724000  |
| H | -26.739000 | 50.112000 | 10.072000 |
| H | -24.315127 | 53.366371 | 10.881427 |
| H | -25.638000 | 51.342000 | 11.638000 |
| H | -26.085000 | 50.911000 | 8.785000  |
| H | -25.219998 | 53.289418 | 9.388660  |
| H | -24.440000 | 51.086000 | 10.325000 |
| O | -28.102000 | 48.675000 | 9.730000  |
| O | -24.500000 | 50.069000 | 7.917000  |
| H | -24.854000 | 49.476000 | 8.584000  |
| H | -24.476000 | 50.964000 | 8.264000  |

|   |            |           |           |
|---|------------|-----------|-----------|
| O | -28.468000 | 51.143000 | 11.618000 |
| H | -28.631000 | 51.743000 | 10.887000 |
| H | -28.219000 | 50.281000 | 11.276000 |
| H | -19.317839 | 49.400287 | 8.872961  |
| H | -18.781616 | 46.905970 | 8.825845  |
| H | -31.410458 | 39.645987 | 10.175530 |
| H | -33.123137 | 41.430587 | 10.585878 |
| H | -24.918352 | 43.101477 | 5.060124  |
| H | -25.276182 | 41.946486 | 6.779506  |
| H | -25.887694 | 41.107471 | 8.704739  |
| H | -33.345573 | 49.336101 | 8.556107  |
| H | -28.983998 | 49.045776 | 4.032157  |
| H | -27.093978 | 50.003599 | 3.587674  |
| H | -27.713832 | 51.469906 | 5.354642  |
| H | -20.965998 | 46.570093 | 12.985693 |
| H | -23.767818 | 43.291125 | 12.930815 |
| H | -22.655830 | 42.972869 | 10.754481 |
| H | -24.867553 | 43.130722 | 14.398882 |
| H | -29.848057 | 41.442364 | 6.473268  |
| H | -25.482274 | 48.523065 | 3.692618  |
| H | -25.150599 | 49.102190 | 5.285017  |
| H | -29.281473 | 46.330082 | 15.766375 |
| H | -29.948755 | 46.332473 | 14.173964 |
| H | -29.757537 | 48.465496 | 15.871345 |
| H | -27.507097 | 48.809032 | 15.424549 |
| H | -30.716503 | 49.736480 | 14.104463 |

H -26.053039 53.545990 10.903018

Optimized structure of  $[\text{Ag}_4]^{4+}$  in constrained 7DC1 cavity :

Ag -27.174248 46.886293 7.647061

Ag -28.912106 45.580500 9.744174

Ag -26.811643 46.856738 11.823799

Ag -24.848644 47.709082 9.780124

N -28.361000 48.860000 4.792000

C -27.081000 49.589000 4.574000

C -25.891000 48.627000 4.676000

C -26.964000 50.740000 5.578000

O -27.127000 50.312000 6.930000

H -26.820000 51.001000 7.524000

H -28.777896 49.166964 5.647553

H -25.999884 51.192138 5.473347

N -26.071000 47.402000 5.159000

C -24.953000 46.440000 5.296000

C -25.498000 45.017000 5.233000

O -26.714000 44.871000 5.238000

C -24.180000 46.719000 6.596000

S -24.925000 46.060000 8.125000

H -24.091000 47.800000 6.706000

H -26.998000 47.118000 5.441000

H -24.248000 46.558000 4.473000

H -23.226000 46.203000 6.487000

N -24.615000 44.048000 5.170000

H -23.638879 44.256229 5.231875

|   |            |           |           |
|---|------------|-----------|-----------|
| N | -25.498000 | 42.692000 | 7.408000  |
| C | -26.141000 | 42.143000 | 8.613000  |
| C | -27.660000 | 42.282000 | 8.539000  |
| O | -28.391000 | 41.595000 | 9.364000  |
| H | -25.782175 | 42.669416 | 9.472669  |
| H | -24.658993 | 43.170734 | 7.666614  |
| N | -28.155000 | 43.145000 | 7.656000  |
| C | -29.605000 | 43.435000 | 7.533000  |
| C | -30.366000 | 42.201000 | 7.022000  |
| O | -31.598116 | 42.083025 | 7.249031  |
| C | -29.860000 | 44.677000 | 6.684000  |
| S | -29.519000 | 46.245000 | 7.532000  |
| H | -30.906000 | 44.674000 | 6.379000  |
| H | -27.514000 | 43.625000 | 7.041000  |
| H | -29.993000 | 43.662000 | 8.526000  |
| H | -29.173000 | 44.624000 | 5.839000  |
| N | -31.221000 | 40.627000 | 10.217000 |
| C | -32.130000 | 41.528000 | 10.972000 |
| C | -31.685000 | 42.966000 | 10.843000 |
| H | -31.594000 | 43.409000 | 11.835000 |
| H | -30.419820 | 41.001675 | 9.750384  |
| H | -32.124594 | 41.248882 | 12.004939 |
| H | -32.419000 | 43.523000 | 10.261000 |
| H | -30.719000 | 43.003000 | 10.339000 |
| C | -33.325000 | 48.376000 | 9.028000  |
| C | -31.958000 | 47.762000 | 8.859000  |

|   |            |           |           |
|---|------------|-----------|-----------|
| N | -30.957000 | 48.407000 | 9.735000  |
| H | -30.670000 | 47.758000 | 10.454000 |
| H | -34.059238 | 47.741331 | 8.577457  |
| H | -31.645000 | 47.875000 | 7.821000  |
| H | -33.540104 | 48.486214 | 10.070345 |
| H | -32.022000 | 46.709000 | 9.134000  |
| H | -30.154000 | 48.677000 | 9.186000  |
| H | -27.840000 | 49.445000 | 9.220000  |
| H | -28.104000 | 48.893000 | 10.664000 |
| O | -31.111000 | 46.252000 | 11.542000 |
| H | -30.238000 | 45.932000 | 11.782000 |
| H | -31.435000 | 45.761000 | 10.784000 |
| N | -28.134000 | 48.991000 | 14.667000 |
| C | -29.405000 | 48.247000 | 14.885000 |
| C | -29.167000 | 46.736000 | 14.783000 |
| C | -30.460000 | 48.722000 | 13.881000 |
| O | -30.008000 | 48.649000 | 12.529000 |
| H | -30.047000 | 49.522000 | 12.131000 |
| H | -27.715817 | 48.692270 | 13.809163 |
| H | -31.334040 | 48.113718 | 13.985628 |
| N | -28.016000 | 46.279000 | 14.300000 |
| C | -27.742000 | 44.830000 | 14.163000 |
| C | -26.237000 | 44.590000 | 14.226000 |
| O | -25.502000 | 45.571000 | 14.221000 |
| C | -28.370000 | 44.300000 | 12.863000 |
| S | -27.427000 | 44.616000 | 11.334000 |

|   |            |           |           |
|---|------------|-----------|-----------|
| H | -29.351000 | 44.763000 | 12.753000 |
| H | -27.307000 | 46.940000 | 14.018000 |
| H | -28.197000 | 44.279000 | 14.986000 |
| H | -28.399000 | 43.216000 | 12.971000 |
| N | -25.839000 | 43.341000 | 14.289000 |
| H | -26.507184 | 42.599581 | 14.227122 |
| N | -24.223000 | 43.428000 | 12.051000 |
| C | -23.426000 | 43.710000 | 10.846000 |
| C | -22.787000 | 45.095000 | 10.920000 |
| O | -21.827000 | 45.385000 | 10.095000 |
| H | -24.061230 | 43.662325 | 9.986285  |
| H | -25.219626 | 43.373298 | 11.989804 |
| N | -23.287000 | 45.955000 | 11.803000 |
| C | -22.813000 | 47.356000 | 11.926000 |
| C | -21.364000 | 47.398000 | 12.437000 |
| O | -20.645759 | 48.406067 | 12.210060 |
| C | -23.761000 | 48.198000 | 12.775000 |
| S | -25.290000 | 48.687000 | 11.927000 |
| H | -23.235000 | 49.103000 | 13.080000 |
| H | -24.023000 | 45.640000 | 12.418000 |
| H | -22.816000 | 47.806000 | 10.933000 |
| H | -24.058000 | 47.576000 | 13.620000 |
| N | -19.574000 | 47.352000 | 9.242000  |
| C | -19.899000 | 48.589000 | 8.487000  |
| C | -21.367000 | 48.923000 | 8.616000  |
| H | -21.697000 | 49.462000 | 7.728000  |

|   |            |           |           |
|---|------------|-----------|-----------|
| H | -20.357313 | 46.730866 | 9.217233  |
| H | -19.660005 | 48.444394 | 7.454106  |
| H | -21.523000 | 49.544000 | 9.498000  |
| H | -21.941000 | 48.002000 | 8.715000  |
| C | -25.232000 | 53.048000 | 10.431000 |
| C | -25.384000 | 51.557000 | 10.600000 |
| N | -26.443000 | 51.013000 | 9.724000  |
| H | -26.739000 | 50.112000 | 10.072000 |
| H | -24.315127 | 53.366371 | 10.881427 |
| H | -25.638000 | 51.342000 | 11.638000 |
| H | -26.085000 | 50.911000 | 8.785000  |
| H | -25.219998 | 53.289418 | 9.388660  |
| H | -24.440000 | 51.086000 | 10.325000 |
| O | -28.102000 | 48.675000 | 9.730000  |
| O | -24.500000 | 50.069000 | 7.917000  |
| H | -24.854000 | 49.476000 | 8.584000  |
| H | -24.476000 | 50.964000 | 8.264000  |
| O | -28.468000 | 51.143000 | 11.618000 |
| H | -28.631000 | 51.743000 | 10.887000 |
| H | -28.219000 | 50.281000 | 11.276000 |
| H | -19.317839 | 49.400287 | 8.872961  |
| H | -18.781616 | 46.905970 | 8.825845  |
| H | -31.410458 | 39.645987 | 10.175530 |
| H | -33.123137 | 41.430587 | 10.585878 |
| H | -24.918352 | 43.101477 | 5.060124  |
| H | -25.276182 | 41.946486 | 6.779506  |

|   |            |           |           |
|---|------------|-----------|-----------|
| H | -25.887694 | 41.107471 | 8.704739  |
| H | -33.345573 | 49.336101 | 8.556107  |
| H | -28.983998 | 49.045776 | 4.032157  |
| H | -27.093978 | 50.003599 | 3.587674  |
| H | -27.713832 | 51.469906 | 5.354642  |
| H | -20.965998 | 46.570093 | 12.985693 |
| H | -23.767818 | 43.291125 | 12.930815 |
| H | -22.655830 | 42.972869 | 10.754481 |
| H | -24.867553 | 43.130722 | 14.398882 |
| H | -29.848057 | 41.442364 | 6.473268  |
| H | -25.482274 | 48.523065 | 3.692618  |
| H | -25.150599 | 49.102190 | 5.285017  |
| H | -29.281473 | 46.330082 | 15.766375 |
| H | -29.948755 | 46.332473 | 14.173964 |
| H | -29.757537 | 48.465496 | 15.871345 |
| H | -27.507097 | 48.809032 | 15.424549 |
| H | -30.716503 | 49.736480 | 14.104463 |
| H | -26.053039 | 53.545990 | 10.903018 |

Optimized structure of  $[\text{Ag}_4]^{2+}$  in constrained 7DC1 cavity :

|    |            |           |           |
|----|------------|-----------|-----------|
| Ag | -27.189764 | 47.238952 | 7.715822  |
| Ag | -28.860772 | 45.762323 | 9.769021  |
| Ag | -27.301700 | 47.134770 | 11.812722 |
| Ag | -25.130535 | 47.709555 | 9.787557  |
| N  | -28.361000 | 48.860000 | 4.792000  |
| C  | -27.081000 | 49.589000 | 4.574000  |



|   |            |           |          |
|---|------------|-----------|----------|
| C | -25.891000 | 48.627000 | 4.676000 |
| C | -26.964000 | 50.740000 | 5.578000 |
| O | -27.127000 | 50.312000 | 6.930000 |
| H | -26.820000 | 51.001000 | 7.524000 |
| H | -28.777896 | 49.166964 | 5.647553 |
| H | -25.999884 | 51.192138 | 5.473348 |
| N | -26.071000 | 47.402000 | 5.159000 |
| C | -24.953000 | 46.440000 | 5.296000 |
| C | -25.498000 | 45.017000 | 5.233000 |
| O | -26.714000 | 44.871000 | 5.238000 |
| C | -24.180000 | 46.719000 | 6.596000 |
| S | -24.925000 | 46.060000 | 8.125000 |
| H | -24.091000 | 47.800000 | 6.706000 |
| H | -26.998000 | 47.118000 | 5.441000 |
| H | -24.248000 | 46.558000 | 4.473000 |
| H | -23.226000 | 46.203000 | 6.487000 |
| N | -24.615000 | 44.048000 | 5.170000 |
| H | -23.638879 | 44.256229 | 5.231876 |
| N | -25.498000 | 42.692000 | 7.408000 |
| C | -26.141000 | 42.143000 | 8.613000 |
| C | -27.660000 | 42.282000 | 8.539000 |
| O | -28.391000 | 41.595000 | 9.364000 |
| H | -25.782175 | 42.669416 | 9.472670 |
| H | -24.658993 | 43.170734 | 7.666614 |
| N | -28.155000 | 43.145000 | 7.656000 |
| C | -29.605000 | 43.435000 | 7.533000 |

|   |            |           |           |
|---|------------|-----------|-----------|
| C | -30.366000 | 42.201000 | 7.022000  |
| O | -31.598116 | 42.083025 | 7.249031  |
| C | -29.860000 | 44.677000 | 6.684000  |
| S | -29.519000 | 46.245000 | 7.532000  |
| H | -30.906000 | 44.674000 | 6.379000  |
| H | -27.514000 | 43.625000 | 7.041000  |
| H | -29.993000 | 43.662000 | 8.526000  |
| H | -29.173000 | 44.624000 | 5.839000  |
| N | -31.221000 | 40.627000 | 10.217000 |
| C | -32.130000 | 41.528000 | 10.972000 |
| C | -31.685000 | 42.966000 | 10.843000 |
| H | -31.594000 | 43.409000 | 11.835000 |
| H | -30.419820 | 41.001675 | 9.750384  |
| H | -32.124594 | 41.248882 | 12.004940 |
| H | -32.419000 | 43.523000 | 10.261000 |
| H | -30.719000 | 43.003000 | 10.339000 |
| C | -33.325000 | 48.376000 | 9.028000  |
| C | -31.958000 | 47.762000 | 8.859000  |
| N | -30.957000 | 48.407000 | 9.735000  |
| H | -30.670000 | 47.758000 | 10.454000 |
| H | -34.059238 | 47.741331 | 8.577458  |
| H | -31.645000 | 47.875000 | 7.821000  |
| H | -33.540104 | 48.486214 | 10.070346 |
| H | -32.022000 | 46.709000 | 9.134000  |
| H | -30.154000 | 48.677000 | 9.186000  |
| H | -27.840000 | 49.445000 | 9.220000  |

|   |            |           |           |
|---|------------|-----------|-----------|
| H | -28.104000 | 48.893000 | 10.664000 |
| O | -31.111000 | 46.252000 | 11.542000 |
| H | -30.238000 | 45.932000 | 11.782000 |
| H | -31.435000 | 45.761000 | 10.784000 |
| N | -28.134000 | 48.991000 | 14.667000 |
| C | -29.405000 | 48.247000 | 14.885000 |
| C | -29.167000 | 46.736000 | 14.783000 |
| C | -30.460000 | 48.722000 | 13.881000 |
| O | -30.008000 | 48.649000 | 12.529000 |
| H | -30.047000 | 49.522000 | 12.131000 |
| H | -27.715817 | 48.692270 | 13.809163 |
| H | -31.334040 | 48.113718 | 13.985628 |
| N | -28.016000 | 46.279000 | 14.300000 |
| C | -27.742000 | 44.830000 | 14.163000 |
| C | -26.237000 | 44.590000 | 14.226000 |
| O | -25.502000 | 45.571000 | 14.221000 |
| C | -28.370000 | 44.300000 | 12.863000 |
| S | -27.427000 | 44.616000 | 11.334000 |
| H | -29.351000 | 44.763000 | 12.753000 |
| H | -27.307000 | 46.940000 | 14.018000 |
| H | -28.197000 | 44.279000 | 14.986000 |
| H | -28.399000 | 43.216000 | 12.971000 |
| N | -25.839000 | 43.341000 | 14.289000 |
| H | -26.507184 | 42.599581 | 14.227122 |
| N | -24.223000 | 43.428000 | 12.051000 |
| C | -23.426000 | 43.710000 | 10.846000 |

|   |            |           |           |
|---|------------|-----------|-----------|
| C | -22.787000 | 45.095000 | 10.920000 |
| O | -21.827000 | 45.385000 | 10.095000 |
| H | -24.061230 | 43.662325 | 9.986285  |
| H | -25.219626 | 43.373298 | 11.989804 |
| N | -23.287000 | 45.955000 | 11.803000 |
| C | -22.813000 | 47.356000 | 11.926000 |
| C | -21.364000 | 47.398000 | 12.437000 |
| O | -20.645759 | 48.406067 | 12.210060 |
| C | -23.761000 | 48.198000 | 12.775000 |
| S | -25.290000 | 48.687000 | 11.927000 |
| H | -23.235000 | 49.103000 | 13.080000 |
| H | -24.023000 | 45.640000 | 12.418000 |
| H | -22.816000 | 47.806000 | 10.933000 |
| H | -24.058000 | 47.576000 | 13.620000 |
| N | -19.574000 | 47.352000 | 9.242000  |
| C | -19.899000 | 48.589000 | 8.487000  |
| C | -21.367000 | 48.923000 | 8.616000  |
| H | -21.697000 | 49.462000 | 7.728000  |
| H | -20.357313 | 46.730866 | 9.217233  |
| H | -19.660005 | 48.444394 | 7.454106  |
| H | -21.523000 | 49.544000 | 9.498000  |
| H | -21.941000 | 48.002000 | 8.715000  |
| C | -25.232000 | 53.048000 | 10.431000 |
| C | -25.384000 | 51.557000 | 10.600000 |
| N | -26.443000 | 51.013000 | 9.724000  |
| H | -26.739000 | 50.112000 | 10.072000 |

|   |            |           |           |
|---|------------|-----------|-----------|
| H | -24.315127 | 53.366371 | 10.881427 |
| H | -25.638000 | 51.342000 | 11.638000 |
| H | -26.085000 | 50.911000 | 8.785000  |
| H | -25.219998 | 53.289418 | 9.388660  |
| H | -24.440000 | 51.086000 | 10.325000 |
| O | -28.102000 | 48.675000 | 9.730000  |
| O | -24.500000 | 50.069000 | 7.917000  |
| H | -24.854000 | 49.476000 | 8.584000  |
| H | -24.476000 | 50.964000 | 8.264000  |
| O | -28.468000 | 51.143000 | 11.618000 |
| H | -28.631000 | 51.743000 | 10.887000 |
| H | -28.219000 | 50.281000 | 11.276000 |
| H | -19.317839 | 49.400287 | 8.872961  |
| H | -18.781616 | 46.905970 | 8.825845  |
| H | -31.410458 | 39.645987 | 10.175530 |
| H | -33.123137 | 41.430587 | 10.585878 |
| H | -24.918352 | 43.101477 | 5.060124  |
| H | -25.276182 | 41.946486 | 6.779506  |
| H | -25.887694 | 41.107471 | 8.704739  |
| H | -33.345573 | 49.336101 | 8.556107  |
| H | -28.983998 | 49.045776 | 4.032157  |
| H | -27.093978 | 50.003599 | 3.587674  |
| H | -27.713832 | 51.469906 | 5.354642  |
| H | -20.965998 | 46.570093 | 12.985693 |
| H | -23.767818 | 43.291125 | 12.930815 |
| H | -22.655830 | 42.972869 | 10.754481 |

|   |            |           |           |
|---|------------|-----------|-----------|
| H | -24.867553 | 43.130722 | 14.398882 |
| H | -29.848057 | 41.442364 | 6.473268  |
| H | -25.482274 | 48.523065 | 3.692618  |
| H | -25.150599 | 49.102190 | 5.285017  |
| H | -29.281473 | 46.330082 | 15.766375 |
| H | -29.948755 | 46.332473 | 14.173964 |
| H | -29.757537 | 48.465496 | 15.871345 |
| H | -27.507097 | 48.809032 | 15.424549 |
| H | -30.716503 | 49.736480 | 14.104463 |
| H | -26.053039 | 53.545990 | 10.903018 |

Experimental structure ( $C_2$ ) of  $Ag_4$  Cluster:

|    |           |           |           |
|----|-----------|-----------|-----------|
| Ag | -0.514904 | -1.748836 | 0.236102  |
| Ag | -2.305118 | 0.390645  | -0.236102 |
| Ag | 0.514904  | 1.748836  | 0.236102  |
| Ag | 2.305118  | -0.390645 | -0.236102 |

Optimized  $T_d$ - $[Ag_4]^{2+}$  Cluster:

|    |           |           |           |
|----|-----------|-----------|-----------|
| Ag | 1.060049  | -1.060049 | 1.060049  |
| Ag | -1.060049 | 1.060049  | 1.060049  |
| Ag | -1.060049 | -1.060049 | -1.060049 |
| Ag | 1.060049  | 1.060049  | -1.060049 |

Optimized  $D_{4h}$ - $[Ag_4]^{2+}$  Cluster:

|    |           |           |          |
|----|-----------|-----------|----------|
| Ag | -1.469085 | -1.469085 | 0.000000 |
| Ag | -1.469085 | 1.469085  | 0.000000 |
| Ag | 1.469085  | -1.469085 | 0.000000 |
| Ag | 1.469085  | 1.469085  | 0.000000 |

Optimized  $D_{2h}$ -[Ag<sub>4</sub>]<sup>2+</sup> Cluster:

Ag 2.692548 0.000000 0.000000

Ag 0.000000 1.448782 0.000000

Ag 0.000000 -1.448782 0.000000

Ag -2.692548 0.000000 0.000000

Optimized  $D_{4h}$ -[C<sub>4</sub>H<sub>4</sub>]<sup>2+</sup> Cluster:

C 0.000000 0.952783 0.000000

C 0.000000 0.000000 1.061328

C 0.000000 -0.952783 0.000000

C 0.000000 0.000000 -1.061328

H 0.000000 2.040396 0.000000

H 0.000000 -2.040396 0.000000

H 0.000000 0.000000 2.129351

H 0.000000 0.000000 -2.129351

**Table S1.** Strengths of single metal– ligand bonds in protein or nonprotein surfaces

| <b>Single thiol-metal bond</b> | <b>protein</b>      | <b>ref</b>       |
|--------------------------------|---------------------|------------------|
| <b>Au-S</b>                    | <b>~165 pN</b>      | <b>1</b>         |
| <b>Cu-S</b>                    | <b>~171 pN</b>      | <b>1</b>         |
| <b>Zn-S</b>                    | <b>~170pN</b>       | <b>2</b>         |
| <b>Zn-S</b>                    | <b>~90pN</b>        | <b>3</b>         |
| <b>Fe-S</b>                    | <b>~211pN</b>       | <b>4</b>         |
| <b>Fe-N</b>                    | <b>~160 pN</b>      | <b>5</b>         |
| <b>Fe-O</b>                    | <b>~127 pN</b>      | <b>6</b>         |
| <b>Ag-S</b>                    | <b>~64 pN Atox1</b> | <b>This work</b> |



**Table S2.** Crystallization Method

| Protein                                | Atox1 for 5F0W                                | Atox1 for 7DC1                                 |
|----------------------------------------|-----------------------------------------------|------------------------------------------------|
| Method                                 | Sitting-drop vapour-diffusion                 | Sitting-drop vapour-diffusion                  |
| Plate type                             | Corning 3552                                  | Corning 3552                                   |
| Temperature (K)                        | 293                                           | 293                                            |
| Protein concentration                  | 27 mg/mL                                      | 29 mg/mL                                       |
| Buffer composition of protein solution | 50 mM Tris-HCl pH 7.5, 150 mM NaCl, 1 mM TCEP | 50 mM Tris-HCl pH 7.5, 150 mM NaCl, 1 mM TCEP  |
| Composition of reservoir solution      | 0.2 M tri-sodium citrate, 20 % (w/v) PEG 3350 | 0.2M LiCl, 0.1M Tris pH 8, 20% (w/v) PEG 6,000 |
| Volume and ratio of drop               | 200 nL protein/200 nL reservoir               | 200 nL protein/200 nL reservoir                |
| Volume of reservoir                    | microlitre.                                   | microlitre.                                    |

**Table S3.** X-ray data collection and refinement statistics

We finished all of the data collection works by use F-RE++ and R-AXIS IV of RIGAKU.

| <b>Data collection</b>                              | <b>5F0W</b>                | <b>7DC1</b>               |
|-----------------------------------------------------|----------------------------|---------------------------|
| Space group                                         | P6 <sub>2</sub>            | P3 <sub>2</sub> 21        |
| Cell dimensions                                     |                            |                           |
| a,b,c(Å)                                            | 112.49, 112.49, 56.63      | 104.49 104.493 29.188     |
| α,β,γ(°)                                            | 90.00, 90.00, 120.00       | 90.000 90.000 120.000     |
| Resolution                                          | 50.00-2.70<br>(2.75-2.70)* | 19.47-1.75<br>(1.78-1.75) |
| <i>R</i> <sub>merge</sub>                           | 12.9(43.7)                 | 5.6 (61.6)                |
| <i>I</i> / $\sigma$ <i>I</i>                        | 17.78(4.68)                | 17.0 (2.3)                |
| Completeness(%)                                     | 90.2(87.4)                 | 98.5 (97.1)               |
| Redundancy                                          | 6.2(6.3)                   | 4.6 (4.3)                 |
| <b>Refinement</b>                                   |                            |                           |
| Resolution(Å)                                       | 24.48-2.70                 | 19.47-1.75                |
| No. unique reflections                              | 10336                      | 18311 (1002)              |
| <i>R</i> <sub>work</sub> / <i>R</i> <sub>free</sub> | 0.26/0.29                  | 0.18/0.20                 |
| No. atoms                                           |                            |                           |
| Protein                                             | 2056                       | 1019                      |
| Ligand/ion                                          | 8                          | 4                         |
| Water                                               | 12                         | 133                       |
| <i>B</i> -factors                                   |                            |                           |
| Protein                                             | 31.55                      | 28.44                     |
| Ligand/ion                                          | 38.73                      | 27.41                     |
| Water                                               | 23.05                      | 39.01                     |
| R.m.s.deviations                                    |                            |                           |
| Bond lengths                                        | 0.014                      | 0.005                     |
| Bond angles                                         | 1.62                       | 1.259                     |

\*Values in parentheses are for highest-resolution shell.

**Table S4.** The Hückel MO energies and MO wavefunctions of planar  $D_{2h}$ - $Ag_4$  cluster.

| MO              | Eigenvalue         | Energy               | Eigenfunctions                                                 |
|-----------------|--------------------|----------------------|----------------------------------------------------------------|
| LUMO+2( $a_g$ ) | $\chi_4 = 1.5616$  | $\alpha-1.5616\beta$ | $\Psi_4=(0.4352\phi_1+0.4352\phi_2-0.5573\phi_3-0.5573\phi_4)$ |
| LUMO+1( $a_u$ ) | $\chi_3 = 1.0000$  | $\alpha-\beta$       | $\Psi_3=(0.7071\phi_1-0.7071\phi_2)$                           |
| LUMO( $b_u$ )   | $\chi_2 = 0.0000$  | $\alpha$             | $\Psi_2=(-0.7071\phi_3+0.7071\phi_4)$                          |
| HOMO( $a_g$ )   | $\chi_1 = -2.5616$ | $\alpha+2.5616\beta$ | $\Psi_1=(0.5573\phi_1+0.5573\phi_2+0.4352\phi_3+0.4352\phi_4)$ |

**Table S5.** The Hückel MO energies and wavefunctions of square planar  $D_{4h}$ - $Ag_4$  cluster.

| MO               | Eigenvalue         | Energy               | Eigenfunctions                                                 |
|------------------|--------------------|----------------------|----------------------------------------------------------------|
| LUMO+1( $a_g$ )  | $\chi_4 = 2.0000$  | $\alpha-2.0000\beta$ | $\Psi_4=(0.5000\phi_1-0.5000\phi_2+0.5000\phi_3-0.5000\phi_4)$ |
| LUMO( $b_{2u}$ ) | $\chi_3 = 0.0000$  | $\alpha$             | $\Psi_3=(0.7071\phi_1-0.7071\phi_3)$                           |
| LUMO( $b_{1u}$ ) | $\chi_2 = 0.0000$  | $\alpha$             | $\Psi_2=(0.7071\phi_2-0.7071\phi_4)$                           |
| HOMO( $a_g$ )    | $\chi_1 = -2.0000$ | $\alpha+2.0000\beta$ | $\Psi_1=(0.5000\phi_1+0.5000\phi_2+0.5000\phi_3+0.5000\phi_4)$ |

**Table S6.** The Hückel MO energies and wavefunctions of the tetrahedron  $T_d$ - $Ag_4$  cluster.

| MO            | Eigenvalue         | Energy               | Eigenfunctions                                                 |
|---------------|--------------------|----------------------|----------------------------------------------------------------|
| LUMO( $t_2$ ) | $\chi_4 = 1.0000$  | $\alpha-1.0000\beta$ | $\Psi_4=(0.5000\phi_1-0.5000\phi_2+0.5000\phi_3-0.5000\phi_4)$ |
| LUMO( $t_2$ ) | $\chi_3 = 1.0000$  | $\alpha-1.0000\beta$ | $\Psi_3=(0.5000\phi_1+0.5000\phi_2-0.5000\phi_3-0.5000\phi_4)$ |
| LUMO( $t_2$ ) | $\chi_2 = 1.0000$  | $\alpha-1.0000\beta$ | $\Psi_2=(0.5000\phi_1-0.5000\phi_2-0.5000\phi_3+0.5000\phi_4)$ |
| HOMO( $a_1$ ) | $\chi_1 = -3.0000$ | $\alpha+3.0000\beta$ | $\Psi_1=(0.5000\phi_1+0.5000\phi_2+0.5000\phi_3+0.5000\phi_4)$ |

**Table S7.** The MO contours and energy of the frontier MOs of  $T_d$ ,  $D_{4h}$ ,  $D_{2h}$  and the  $C_2$  experimental measured structures  $[Ag_4]^{2+}$  cluster (isosurface = 0.03 a.u.) .

|             | $T_d$              | $D_{4h}$              | $C_2, \text{Exp}$ | $D_{2h}$           |
|-------------|--------------------|-----------------------|-------------------|--------------------|
| MO diagram  |                    |                       |                   |                    |
| E / Hartree |                    |                       |                   |                    |
| LUMO+2      |                    |                       |                   |                    |
|             | $t_2, E = -0.4406$ | $b_{2g}, E = -0.3784$ | $a, E = -0.3859$  | $a_g, E = -0.3961$ |
| LUMO+1      |                    |                       |                   |                    |
|             | $t_2, E = -0.4406$ | $e_{1u}, E = -0.4611$ | $b, E = -0.4450$  | $b_u, E = -0.4247$ |
| LUMO        |                    |                       |                   |                    |
|             | $t_2, E = -0.4406$ | $e_{1u}, E = -0.4611$ | $b, E = -0.4717$  | $b_u, E = -0.4760$ |
| HOMO        |                    |                       |                   |                    |
|             | $a_1, E = -0.5699$ | $a_{1g}, E = -0.5468$ | $a, E = -0.5450$  | $a_g, E = -0.5459$ |

**Table S8.** The calculated NICS values (ppm) of the  $\text{Ag}_4^{2+}$  cluster

| Structure                                                                         | Number of $\text{Bq}_x^a$ | NICS (ppm) <sup>b</sup> |
|-----------------------------------------------------------------------------------|---------------------------|-------------------------|
| 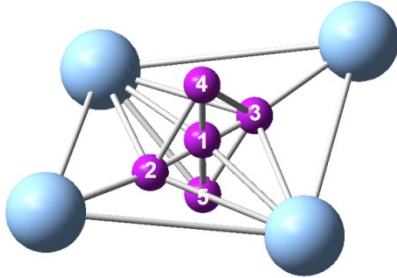 | 1                         | -15.9                   |
|                                                                                   | 2                         | -16.4                   |
|                                                                                   | 3                         | -16.4                   |
|                                                                                   | 4                         | -8.3                    |
|                                                                                   | 5                         | -9.7                    |

<sup>a</sup>  $\text{Bq}_x$  represents the ghost atom with numbering  $x$ . <sup>b</sup> For benzene: -8.0 ppm at the center and -10.2 ppm at 1 Å above the ring plane)

**Table S9.** Constrained DFT optimization results of the  $[\text{Ag}_4]^{q+}$  core in the experimental cavity of 7DC1.

| Specie                                           | Total Charge | q  | Geometry Structure   |         |         |         |                    |         |                 |                 |
|--------------------------------------------------|--------------|----|----------------------|---------|---------|---------|--------------------|---------|-----------------|-----------------|
|                                                  |              |    | Bond Length ( Å )    |         |         |         | Dihedral Angle (°) |         |                 |                 |
|                                                  |              |    | Ag1-Ag2              | Ag1-Ag4 | Ag2-Ag3 | Ag3-Ag4 | Ag1-Ag3            | Ag2-Ag4 | Ag1-Ag2-Ag4-Ag3 | Ag2-Ag1-Ag3-Ag4 |
| $\text{Ag}_4\text{-(Atox1)}_2$ 7DC1 (Experiment) |              |    | 2.83                 | 3.17    | 3.17    | 2.83    | 3.65               | 4.68    | 150.8           | 157.0           |
| [ $\text{Ag}_4$ ] in cavity of 7DC1              | 0            | +4 | 3.02                 | 3.26    | 3.22    | 2.96    | 4.19               | 4.59    | 166.3           | 167.4           |
|                                                  | -2           | +2 | 3.03                 | 2.96    | 2.91    | 3.02    | 4.10               | 4.21    | 151.8           | 152.5           |
|                                                  | -4           | 0  | null (not converged) |         |         |         |                    |         |                 |                 |

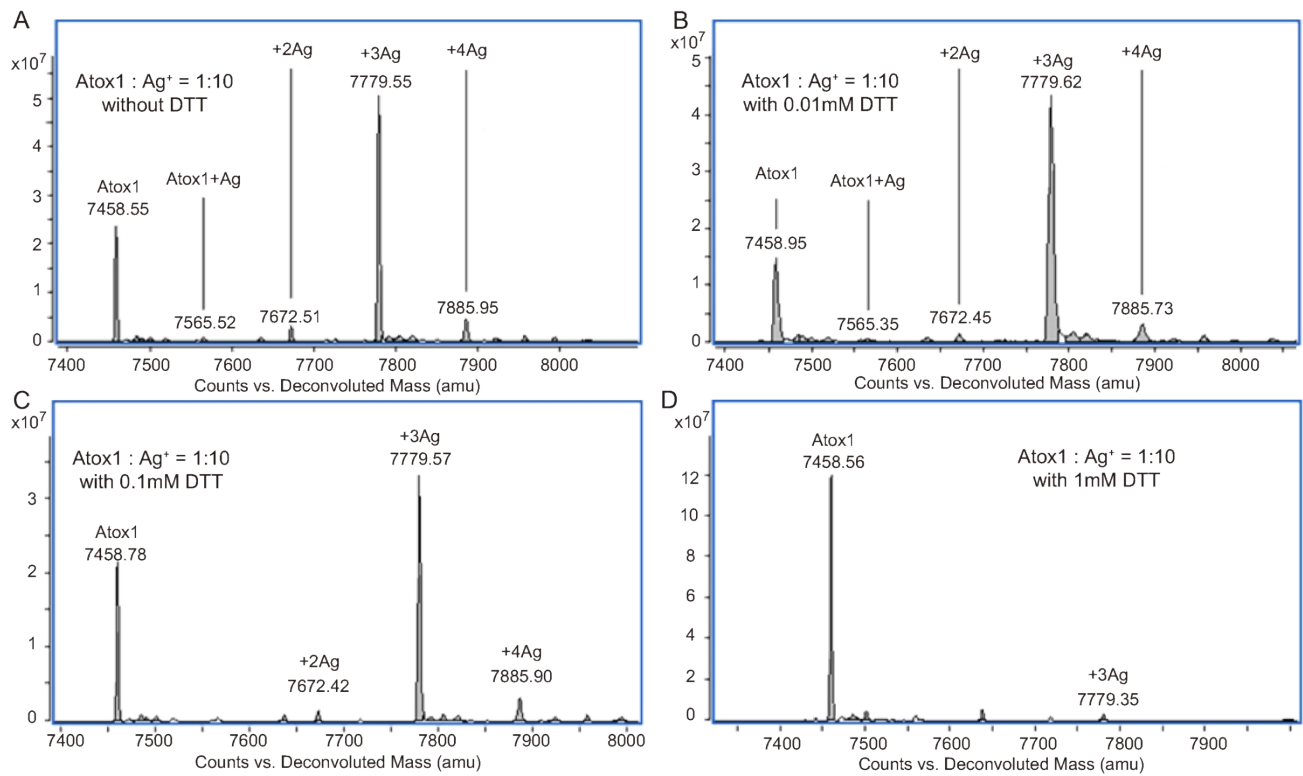

**Figure S1.** The liquid chromatography electrospray ionization tandem mass spectrometry (LC-ESI-MS) measurement of Atox1 and silver ions. (A) LC-ESI-MS of Atox1 protein (Found: 7458.55Da, expected: 7458.94Da) and Atox1 in complex with different equivalents of Ag ion. (B) (C) (D) ESI-MS of Atox1 protein and Atox1 in complex with different equivalents of Ag ion in the different buffer conditions including 0.01 to 1 mM DTT.

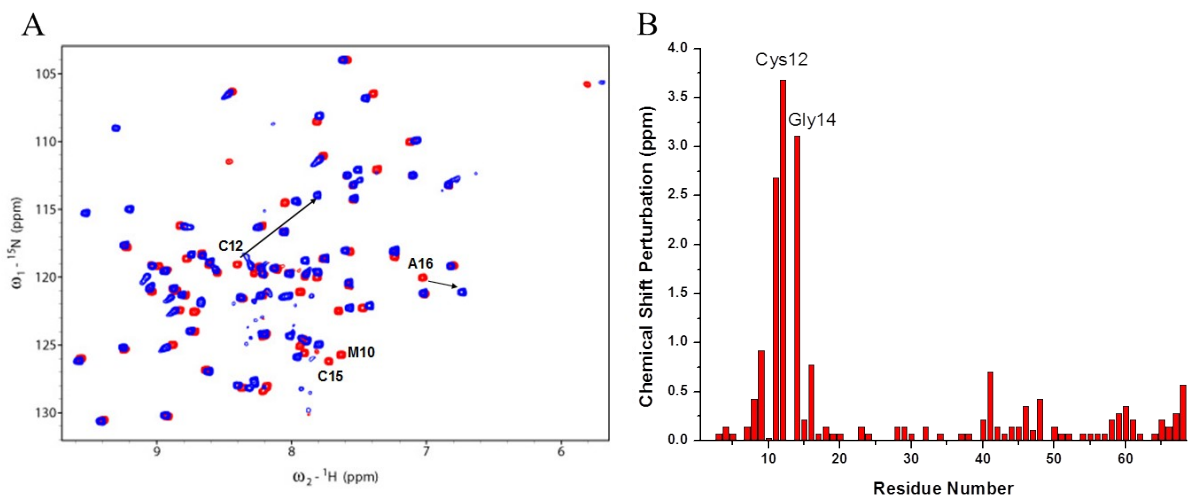

**Figure S2.** NMR analysis of  $\text{Ag}^+$  binding to Atox1. (A) Overlay of  $^1\text{H}$ ,  $^{15}\text{N}$ -HSQC NMR spectra of Atox1 apo-Atox1 before (red) and after (blue) adding equimolar  $\text{Ag}^+$ . (B) Chemical shift perturbation  $\Delta\delta$  against the residue number ( $\Delta\delta = \sqrt{[(\Delta\delta_H)^2 + (\Delta\delta_N/5)^2]}/2$ ).

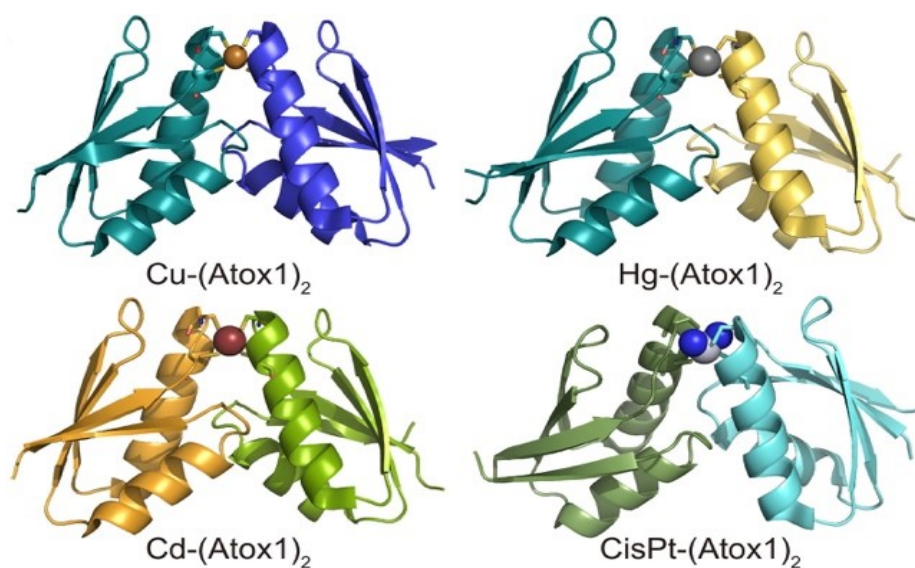

**Figure S3.** Atox1 crystal structures in the presence of metals (Cu-Atox12 PDB accession code 1FEE, Hg-Atox12 PDB accession code 1FE4, Cd-Atox12 PDB accession code 1FE0, CisPt-Atox12 PDB accession code 3IWX).

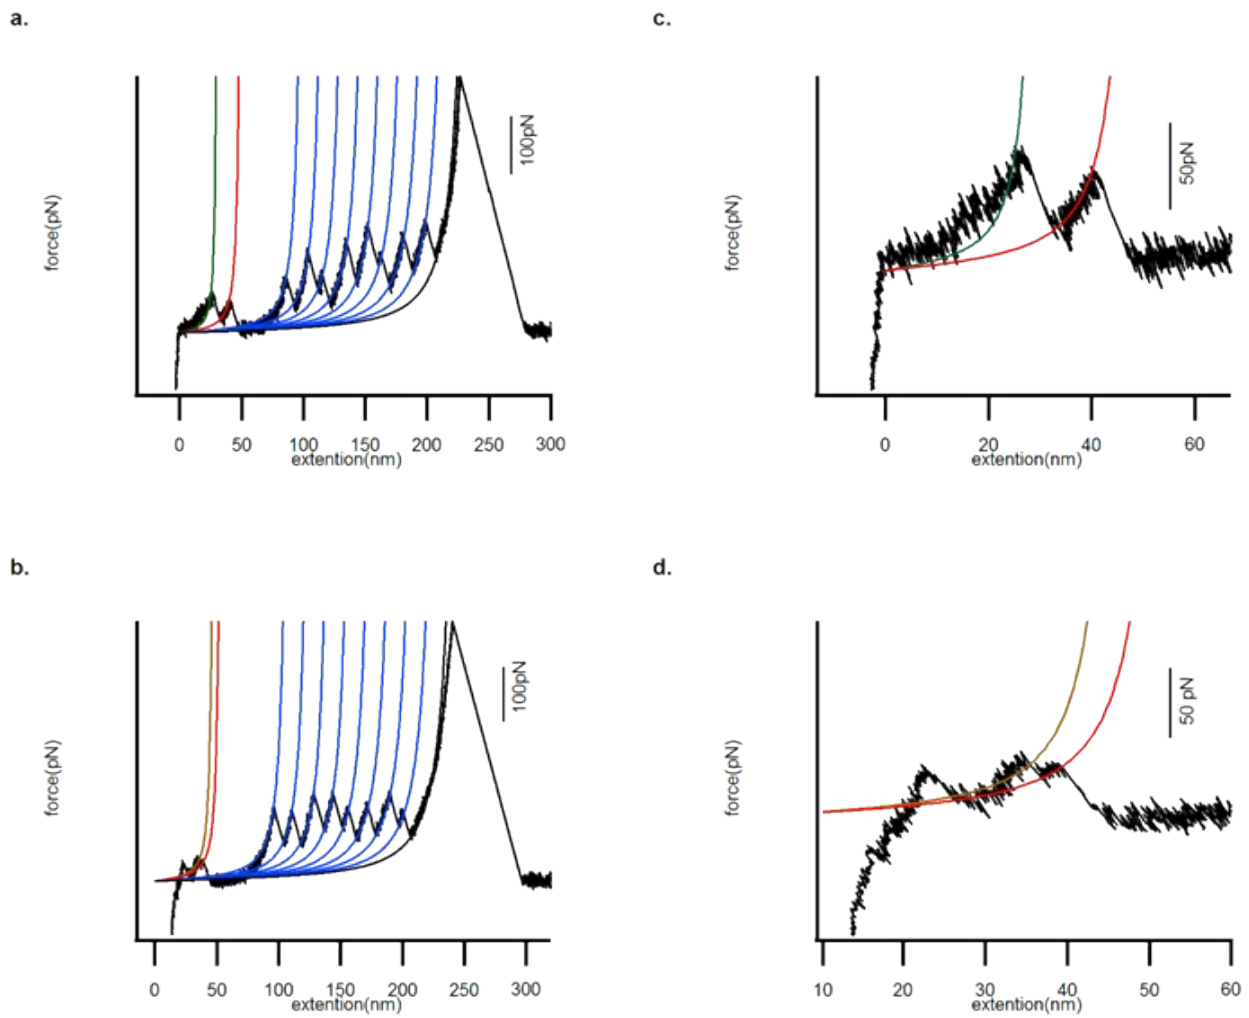

**Figure S4.** The rare cases we observed in the single-molecule force spectroscopy experiments. The SMFS measurements on the engineered chimeric polyprotein in the presence of Ag, and the rupture of Ag4-(Atox1)<sub>2</sub> complex proceeded in two steps.



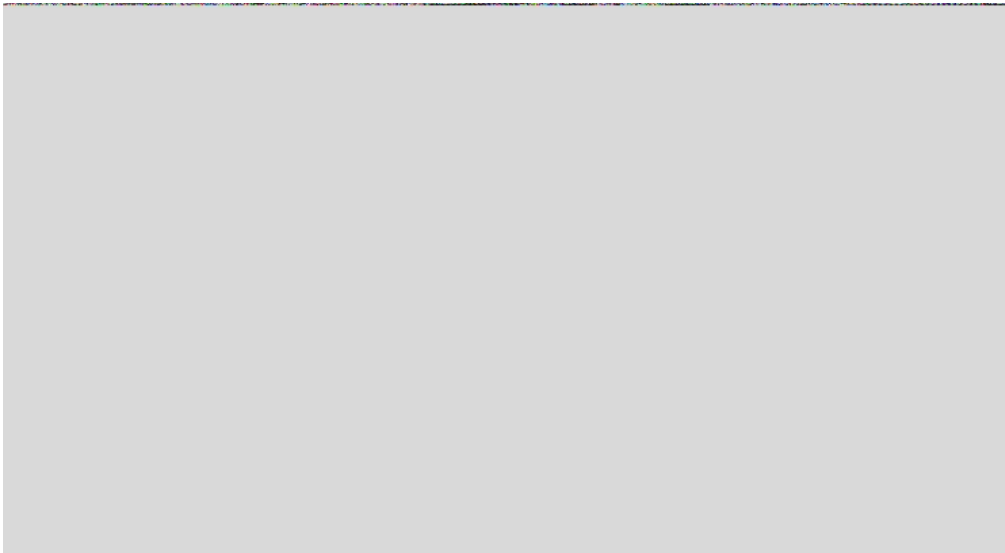

**Figure S5.** Reported Atox1 crystal structures in the presence of metals and  $\text{Ag}_4\text{-(Atox1)}_2$  in this work. Crystal structure of Ag bound to an Atox1 dimer with 2.70 Å (PDB accession code 5F0W).

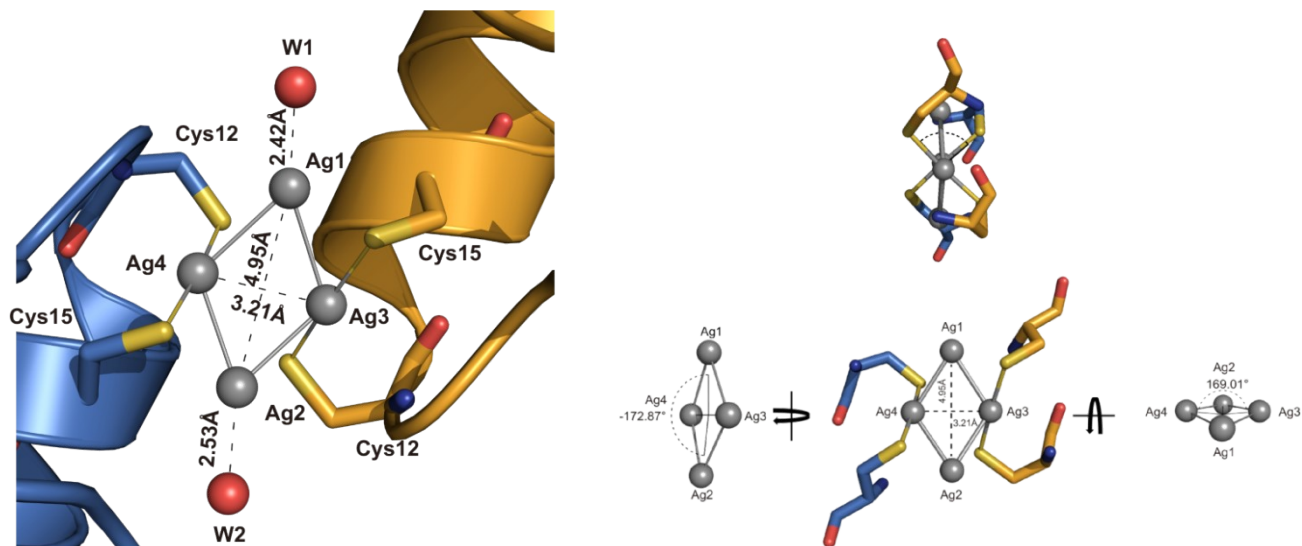

**Figure S6.** Close-up view showing details of the tetrasilver cluster in Atox1 dimer(5F0W). The distance between Ag1 and Ag4 is 3.01 Å. The distance between Ag1 and Ag3 is 2.95 Å. The distance between Ag2 and Ag3 is 2.95 Å. The distance between Ag2 and Ag4 is 2.89 Å. The Angle Ag4-Ag1-Ag3 is 65.01°, and the angle Ag4-Ag2-Ag3 is 66.56°. The four silver ions are situated nearly on the same plane, forming four Ag-Ag bonds with an average dihedral angle of 171°.

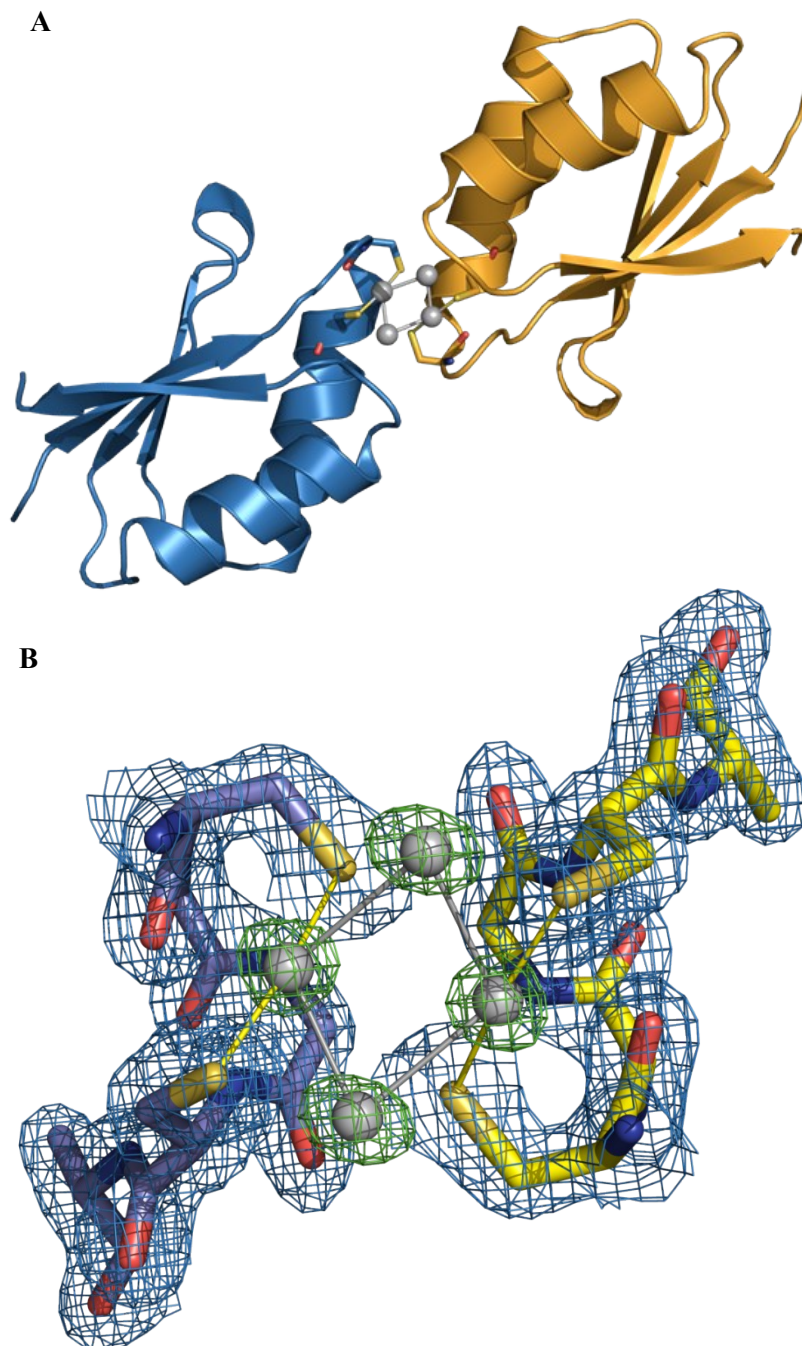

**Figure S7.** (A) Crystal structure of Ag bound to an Atox1 dimer with 1.75 Å (PDB accession code 7DC1). (B) The superimposed  $2Fo-Fc$  electron density map of  $Ag_4-(Atox1)_2$ .  $2Fo-Fc$  electron density map (gray,  $1.00\sigma$ ) of  $Ag_4-(Atox1)_2$  metal center with anomalous difference Fourier density showing the Ag ions superimposed (green,  $6\sigma$ ).

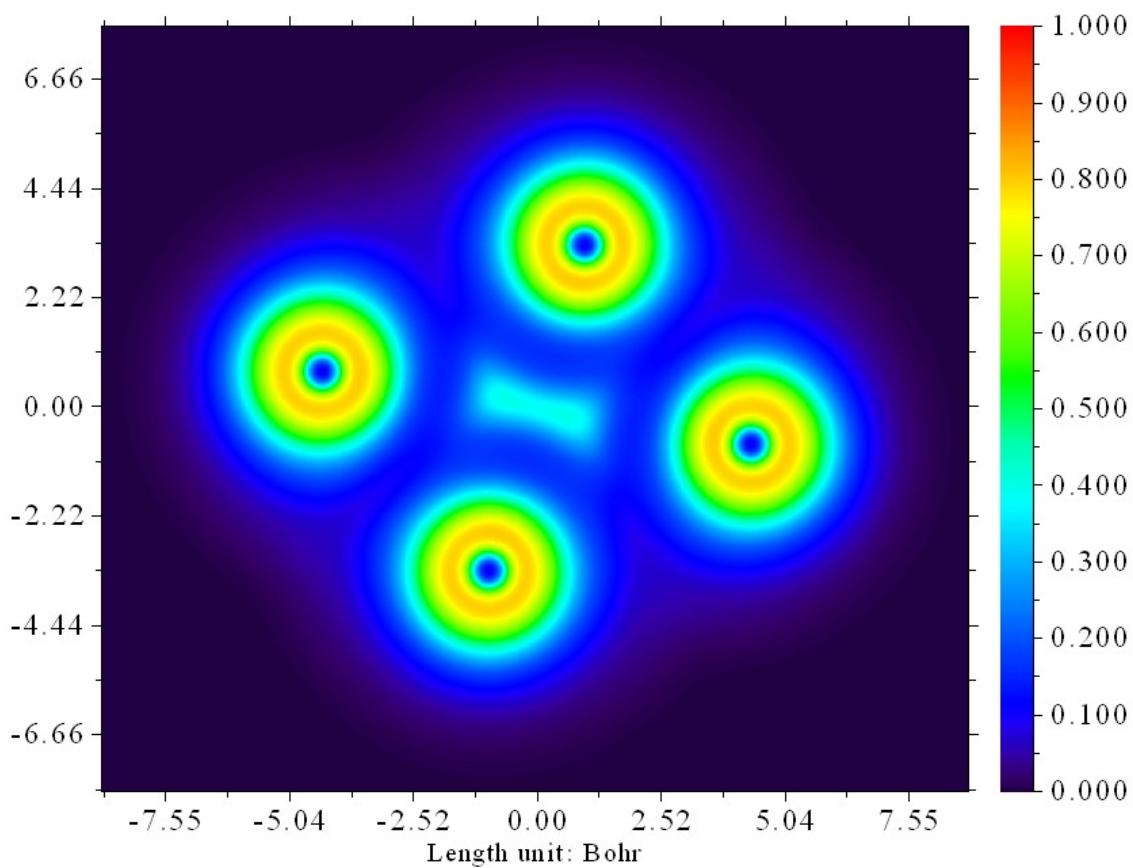

**Figure S8.** The ELF color-filled map of  $\text{Ag}_4^{2+}$  generated by Multiwfn. Significant electron-pair density in the center of the cluster supported delocalized 4-center weak bonding.

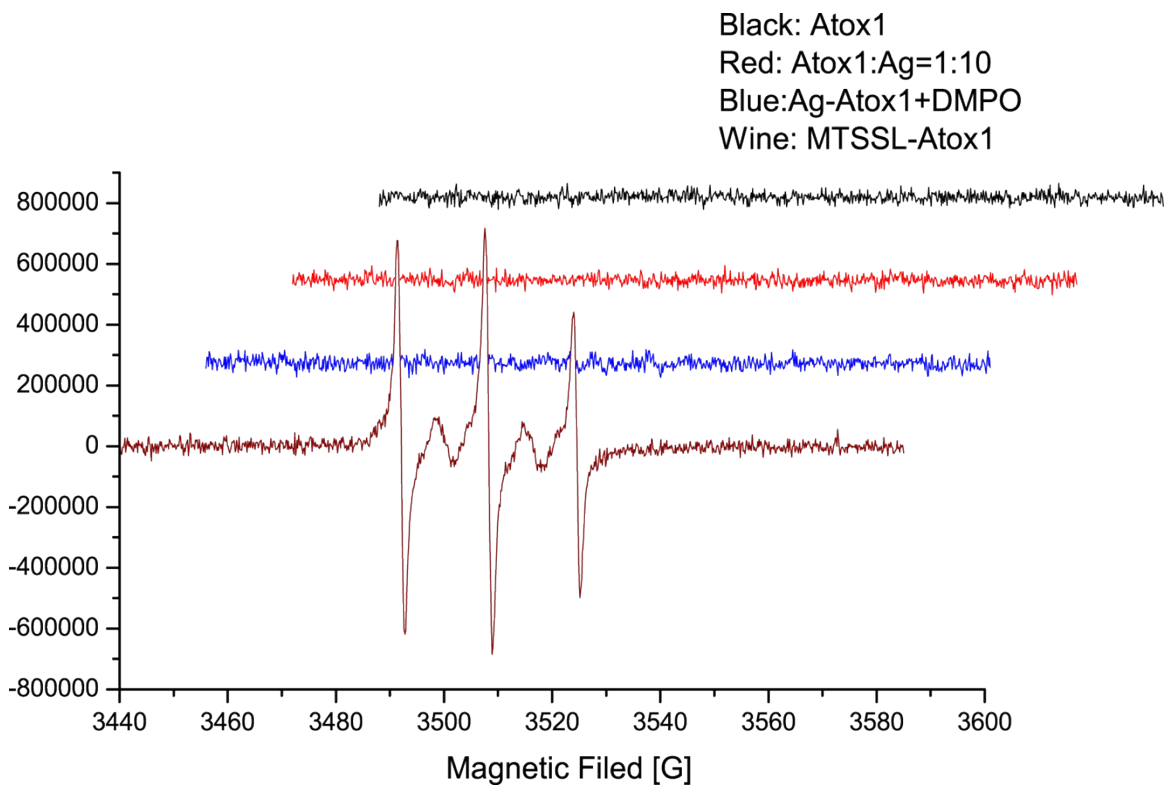

**Figure S9.** The CW-EPR spectra measurement of Atox1, Atox1-Ag, Ag-Atox1 with DMPO and MTSSL-Atox1.

## References

1. W. Wei, Y. Sun, M. Zhu, X. Liu, P. Sun, F. Wang, Q. Gui, W. Meng, Y. Cao and J. Zhao, *J Am Chem Soc*, 2015, **137**, 15358-15361.
2. S. R. Ainarapu, J. Brujic, H. H. Huang, A. P. Wiita, H. Lu, L. Li, K. A. Walther, M. Carrion-Vazquez, H. Li and J. M. Fernandez, *Biophys J*, 2007, **92**, 225-233.
3. I. C. Shaw, *Chem Rev*, 1999, **99**, 2589-2600.
4. S. Chernousova and M. Epple, *Angew Chem Int Edit*, 2013, **52**, 1636-1653.
5. G. B. Song, F. Tian, H. X. Liu, G. Q. Li and P. Zheng, *J Phys Chem Lett*, 2021, **12**, 3860-3867.
6. G. D. Yuan, H. X. Liu, Q. Ma, X. Li, J. Y. Nie, J. L. Zuo and P. Zheng, *J Phys Chem Lett*, 2019, **10**, 5428-5433.
